# Supplementary material
Source: publisher site journal article supplement (https://www.spandidos-publications.com/3483/downloadSupplementary)
Supplement: Supplementary file 1 [file downloadSupplementary]

## Sheet: Table SII
Table SII. Primers used for Sanger sequencing of CCK-81 harboring RHOAR5Q and RHOAY42C.
Wild-type specific forward	5'-AGCAATGGCTGCCATCCG-3'
Wild-type specific reverse	5'-TCCACCTCGATATCTGCCACAT-3'
Mutant specific forward	5'-CAGCAATGGCTGCCATCCA-3'
Mutant specific reverse	5'-CCACCTCGATATCTGCCACAC-3'
Intron forward	5'-CTATGACTTCTTGTGCATTGCAGG-3'
Intron reverse	5'-ATGGCAGGATGAGAATGGATTCTTC-3'
